# Supplementary material for: Effects of Triflusal and Clopidogrel on the Secondary Prevention of Stroke Based on Cytochrome P450 2C19 Genotyping
Source: PubMed Central journal article supplement — J Stroke. 2017 Sep 29;19(3):356–64. doi: 10.5853/jos.2017.01249 (PMC5647640; doi:10.5853/jos.2017.01249), 2017-09-29
Supplement: jos-2017-01249-suppl2.pdf [file jos-2017-01249-suppl2.pdf]

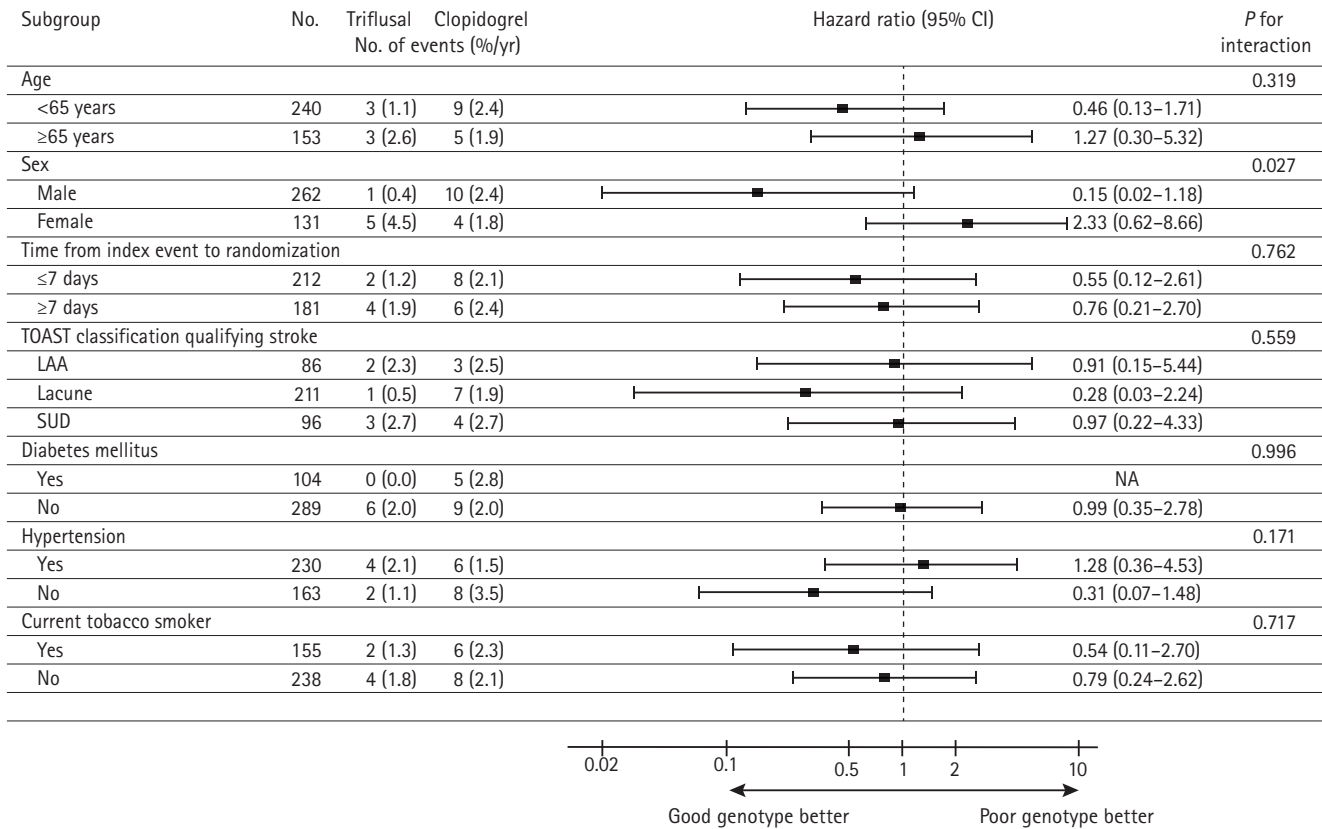

**Supplementary Figure 2.** Hazard ratios for the primary outcome in subgroups of participants who received clopidogrel treatment. CI, confidence interval; TOAST, Trial of ORG 10172 in the Acute Stroke Treatment; LAA, large artery atherosclerosis; SUD, stroke of undetermined aetiology; N/A, not available.
